# Supplementary material for: Morphological Study and Dielectric Behavior of Nonisothermally Crystallized Poly(ethylene naphthalate) Nanocomposites as a Function of Graphene Content
Source: Hindawi journal article supplement (doi:10.1155/2016/9846102), 2016-01-01
Supplement: f1 [file 9846102.f1.docx]

**Supplementary material.**

The structure of pristine graphene by means of micro-raman spectroscopy by using an XploRATM Raman Microscope of HORIBA Scientific. The wavelength of laser excitation was 532 nm with an acquisition time of 15 s. The results of this characterization are shown in Figure 1 where three main bands are shown; the D-band at ≈1350 cm-1 is associated to the hybridization sp3 originated by the defects on the graphene layer, the G-Band at ≈ 1582 cm-1 is related to all sp2 carbon forms, and the G’-band at ≈ 2692 -1 [L.M. Malard, et al., Physics Reports, 2009, 473, 51-87, DOI: 10.1016/j.physrep.2009.02.003]. This last band has been used to determine the number of layers of graphene [L.M. Malard, et al., Physics Reports, 2009, 473, 51-87, DOI: 10.1016/j.physrep.2009.02.003, Mildred S. Dresselhaus et al., Nano Lett. 2010, 10, 751–758, DOI: 10.1021/nl904286r]. It has been reported that the ID/IG ratio provide information about the degree of defects of graphene layers [L. G. Cancado et al., Nano Lett. 2011, 11, 3190–3196, DOI: 10.1021/nl201432g]. In the case of the graphene used in this paper, the value of ID/IG ratio was ≈ 0.13. This result indicates that the pristine graphene has a low degree of defects. Additionally, a little analysis of G’-band indicates the possibility that this graphene has approximately a number of layers higher than 4 [I Calizo et al., Journal of Physics: Conference Series 109 (2008) 012008, DOI: 0.1088/1742-6596/109/1/012008, L.M. Malard, et al., Physics Reports, 2009, 473, 51-87, DOI: 10.1016/j.physrep.2009.02.003, Mildred S. Dresselhaus et al., Nano Lett. 2010, 10, 751–758, DOI: 10.1021/nl904286r].


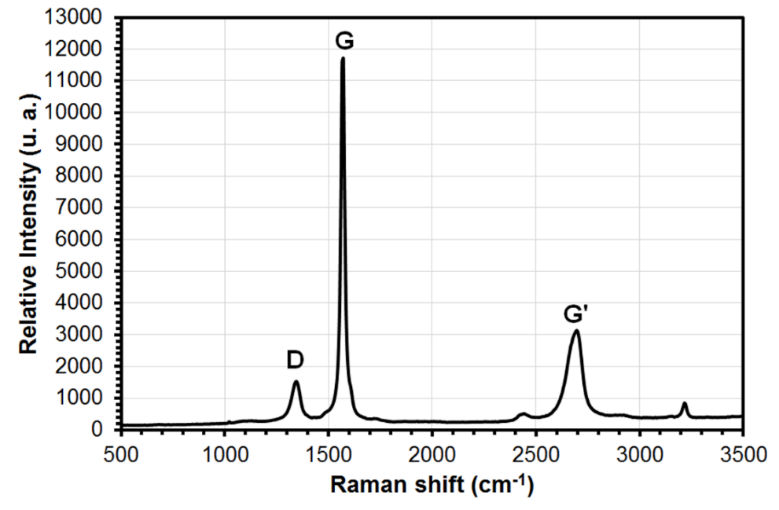


**Figure 1.** RAMAN spectrum of pristine graphene.
